# Supplementary material
Source: PubMed Central journal article supplement (PMC8384700)
Supplement: NIHMS1718511-supplement-Supplemental_Publication_Material.pdf [file NIHMS1718511-supplement-Supplemental_Publication_Material.pdf]

## **SUPPLEMENTAL MATERIAL**

### **Contributors for Workshop 1 Cerebroprotection Manuscript**

Saeed Ansari Joseph P Broderick Bruce C V Campbell Napasri Chaisinanunkul Christopher Chen James C Grotta Walid Haddad Randa Hareedy Michael D Hill Gary Houser Ashutosh P Jadhav Pooja Khatri W Taylor Kimberly James I Koenig William S Korinek Jaren W Landen Maarten G Lansberg Lawrence L Latour David S Liebeskind Theodore E Liston John Lynch John McGonigle Eva A Mistry J Mocco Kent E Pryor Jeffrey L Saver Sean I Savitz Kevin N Sheth Yoram Solberg Achala Vagal Chitra Venkatasubramanian Nikolaos K Ziogas
